# Supplementary material
Source: Elsevier journal article supplement (https://www.sciencedirect.com/science/article/pii/S2341287923000364)
Supplement: mmc1 [file S2341287923000364:mmc1.doc]

**Anexo 1. Miembros del Grupo del Estudio del Registro MATUCIP de la Sociedad Española de Cuidados Intensivos Pediátricos (SECIP)**

Lorena Bermúdez Barrezueta (H. Clínico Universitario de Valladolid), Sylvia Belda Hofheinz y Ana Arias Felipe (H. Universitario 12 de Octubre), Amelia Martínez De Azagra Garde y María l. Iglesias Bouza (H. Infantil Universitario Niño Jesús), Sara Bobillo Pérez (H. Sant Joan de Déu), Manuel Nieto Faza (H. Universitario de Cruces), Juan Francisco Collado Capar y María Miñambres Rodríguez (H. Clínico Universitario Virgen de la Arrixaca, Raquel Díaz Soto y Angela Ferrer Barba (Complejo H. Universitario de La Coruña), Inmaculada Sánchez Ganfornina y Elena González Río (H. Universitario Virgen del Rocío), Corsino Rey Galán (H. Central de Asturias), Débora Sanz Álvarez y María José Santiago Lozano (H. General Universitario Gregorio Marañón), María Luisa Palacios Loro (H. Universitario de Navarra), Esteban Gómez Sánchez (H. Universitario de Burgos), Andrés Alcaraz Romero (H. Universitario de Getafe), Lourdes Artacho González (H. Universitario de Málaga), Raúl Montero Yéboles (H. Universitario Reina Sofía), Luis J. Ferrero de la Mano (H. Universitario de León),

Raúl Borrego Domínguez (Complejo H. de Toledo), Diana Álvarez Demanuel (H. Álvaro Cunqueiro de Vigo), Victoria Guerra Martín (H. de Tenerife), Paula Santos Herráiz y Raúl Borrego (H. Universitario de Toledo).

Coordinador: Antonio Rodríguez Núñez (H. Clínico Universitario de Santiago de Compostela).
